# Supplementary material for: MicroRNA-125b upregulation confers aromatase inhibitor resistance and is a novel marker of poor prognosis in breast cancer
Source: PubMed Central journal article supplement (PMC4342894; doi:10.1186/s13058-015-0515-1), 2015-01-30
Supplement: 13058_2015_515_MOESM1_ESM.pdf [file 13058_2015_515_MOESM1_ESM.pdf]

**Table S1 Characteristics of the 65 patients with primary breast cancer from the Centre Léon Bérard (Lyon, France).**

|                                           | Number of patients<br>(n = 65) |         |      |
|-------------------------------------------|--------------------------------|---------|------|
| Age (years)                               |                                |         |      |
| ≤ 50                                      | 29                             | (44.6%) | 44,6 |
| > 50                                      | 36                             | (55.4%) | 55,4 |
| Macroscopic tumor size <sup>a</sup>       |                                |         |      |
| ≤ 30 mm                                   | 28                             | (43.1%) | 43,1 |
| > 30 mm                                   | 36                             | (55.4%) | 55,4 |
| Lymph node status                         |                                |         |      |
| ≤ 3 involved                              | 40                             | (61.5%) | 61,5 |
| > 3 involved                              | 25                             | (38.5%) | 38,5 |
| SBR grade <sup>b</sup>                    |                                |         |      |
| 1                                         | 4                              | (6.2%)  | 6,2  |
| 2                                         | 18                             | (27.7%) | 27,7 |
| 3                                         | 43                             | (66.2%) | 66,2 |
| Estrogen Receptor status <sup>c</sup>     |                                |         |      |
| Positive                                  | 36                             | (55.4%) | 55,4 |
| Negative                                  | 29                             | (44.6%) | 44,6 |
| Progesterone Receptor status <sup>c</sup> |                                |         |      |
| Positive                                  | 35                             | (53.8%) | 53,8 |
| Negative                                  | 30                             | (46.2%) | 46,2 |
| HER2 status <sup>d</sup>                  |                                |         |      |
| Positive                                  | 17                             | (26.2%) | 26,2 |
| Negative                                  | 48                             | (73.8%) | 73,8 |

<sup>a</sup> Information available for 64 patients.

<sup>b</sup> Scarff-Bloom-Richardson classification.

<sup>c</sup> Measured by immunohistochemistry (IHC).

<sup>d</sup> Measured by IHC. A few samples were validated by Fluorescence *in situ* hybridization (FISH).
