# Supplementary material for: MicroRNA-125b upregulation confers aromatase inhibitor resistance and is a novel marker of poor prognosis in breast cancer
Source: PubMed Central journal article supplement (PMC4342894; doi:10.1186/s13058-015-0515-1), 2015-01-30
Supplement: 13058_2015_515_MOESM3_ESM.pdf [file 13058_2015_515_MOESM3_ESM.pdf]

**A**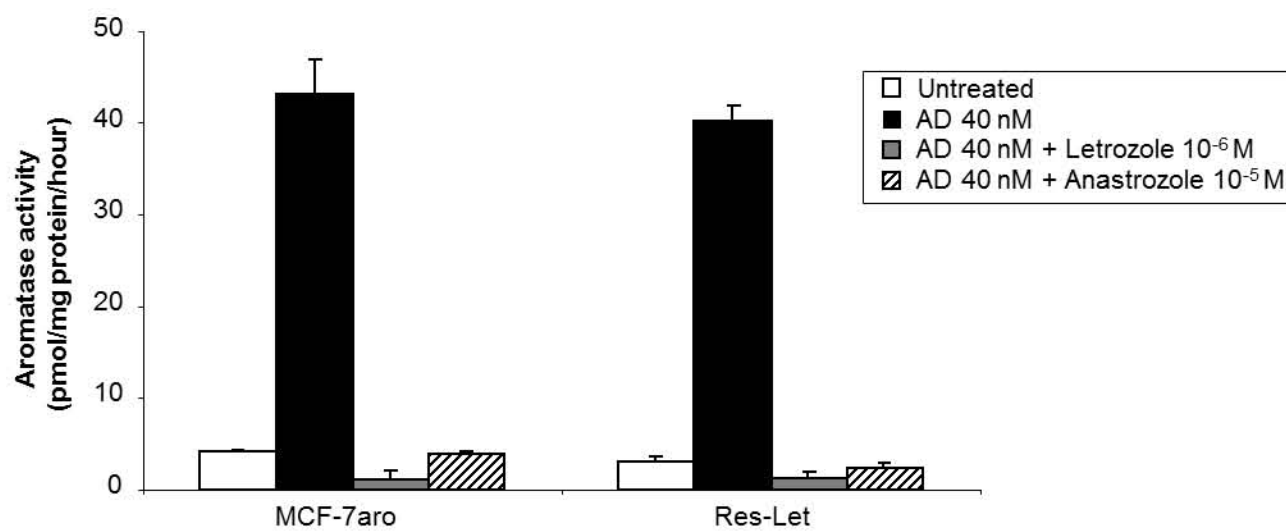**B**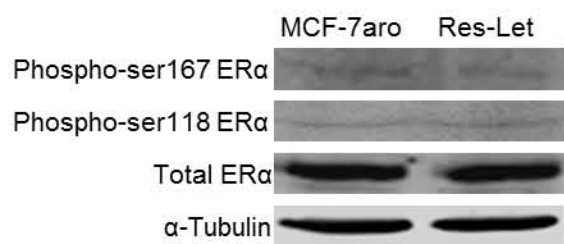**C**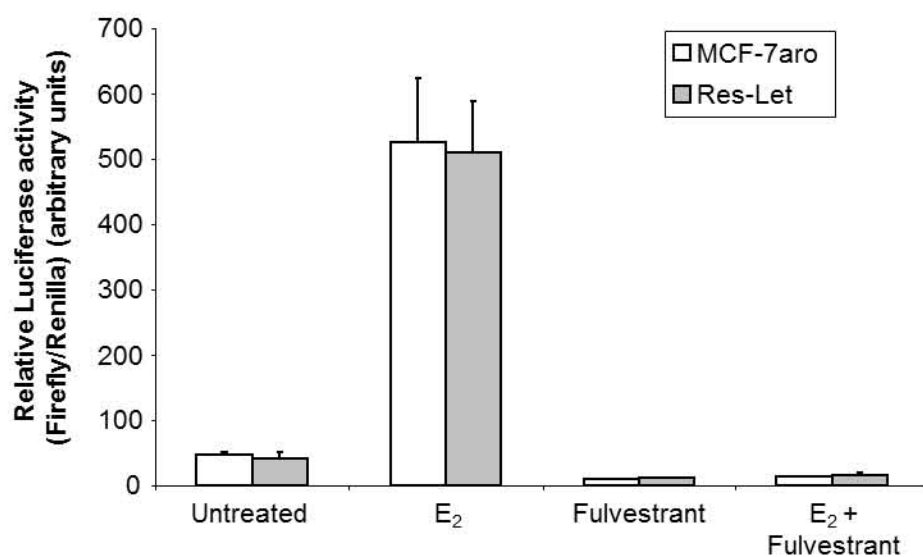

**Figure S1 Aromatase inhibitor resistance acquired by the Res-Let is not due to an impaired activity of the aromatase or to an altered ERα expression or functionality.** (A) Aromatase activity in MCF-7aro and Res-Let cell lines. AD, 4-androstenedione. (B) Western-blot analysis of Phospho-ser167 ERα, phospho-ser118 ERα and total ERα protein expression in MCF-7aro and Res-Let cells. Representative image from three independent cell lysates. (C) Relative luciferase activity of MCF-7aro and Res-Let cell lines in response to 17β-estradiol (E<sub>2</sub>, 10<sup>-9</sup> M), fulvestrant (10<sup>-7</sup> M) or a combination of E<sub>2</sub> + fulvestrant. Histograms represent the ratio of firefly value normalized to renilla value (mean ± SD of three independent experiments).
