# Supplementary material for: MicroRNA-125b upregulation confers aromatase inhibitor resistance and is a novel marker of poor prognosis in breast cancer
Source: PubMed Central journal article supplement (PMC4342894; doi:10.1186/s13058-015-0515-1), 2015-01-30
Supplement: 13058_2015_515_MOESM5_ESM.pdf [file 13058_2015_515_MOESM5_ESM.pdf]

**A**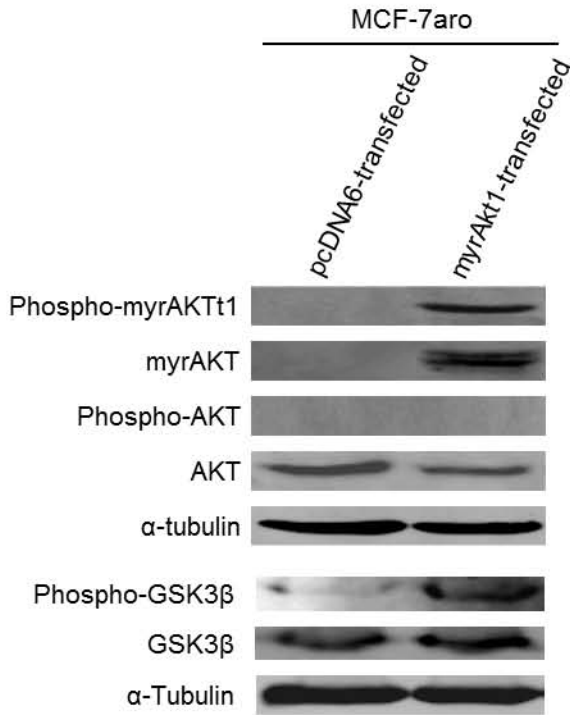**B**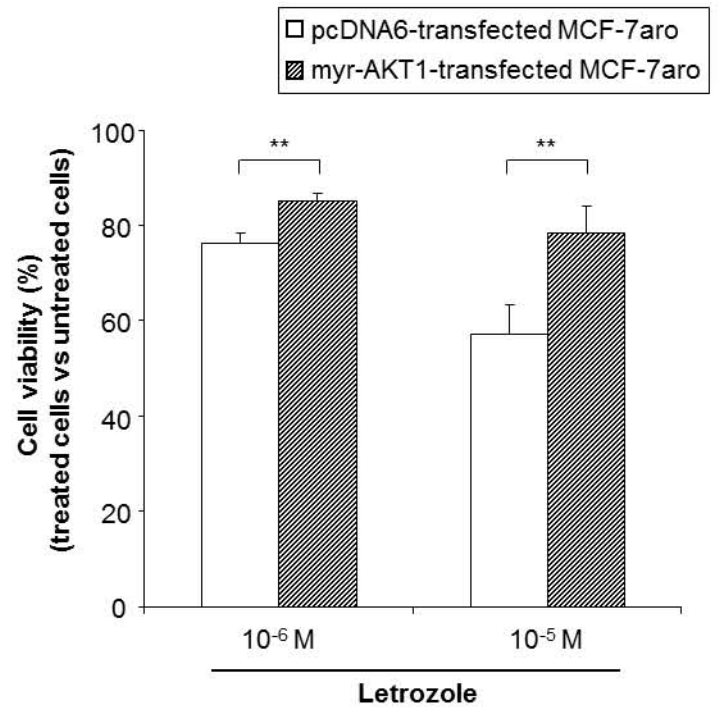

**Figure S3 Constitutive activation of AKT is sufficient to induce *de novo* resistance to letrozole in MCF-7aro cells. (A)** Western-blot analysis of the activation status of the AKT pathway in MCF-7aro cells transiently transfected by either empty pcDNA6 vector or myrAKT1 vector. **(B)** Cell viability of pcDNA6-transfected MCF-7aro and myrAKT1-transfected MCF-7aro cells in response to letrozole (mean  $\pm$  SD from four independent experiments). **\*\*** $P < 0.01$  (Student's *t*-test).
