# Supplementary material for: MicroRNA-125b upregulation confers aromatase inhibitor resistance and is a novel marker of poor prognosis in breast cancer
Source: PubMed Central journal article supplement (PMC4342894; doi:10.1186/s13058-015-0515-1), 2015-01-30
Supplement: 13058_2015_515_MOESM6_ESM.pdf [file 13058_2015_515_MOESM6_ESM.pdf]

**Table S2 Statistical comparison of the different histological grades between tumor samples with low and high miR-125b-5p expression levels**

|                    | Number of samples (%)             |                                    | <i>P</i> <sup>a</sup> |
|--------------------|-----------------------------------|------------------------------------|-----------------------|
|                    | Low miR-125b-5p expression levels | High miR-125b-5p expression levels |                       |
| Histological grade |                                   |                                    |                       |
| SBR1               | 1 (11%)                           | 3 (23%)                            | 0.62                  |
| SBR2               | 8 (89%)                           | 10 (77%)                           |                       |
| Histological grade |                                   |                                    |                       |
| SBR1               | 1 (4%)                            | 3 (14%)                            | 0.33                  |
| SBR3               | 24 (96%)                          | 19 (86%)                           |                       |
| Histological grade |                                   |                                    |                       |
| SBR2               | 8 (25%)                           | 10 (34%)                           | 0.57                  |
| SBR3               | 24 (75%)                          | 19 (66%)                           |                       |
| Histological grade |                                   |                                    |                       |
| SBR1+2             | 9 (27%)                           | 13 (40%)                           | 0.30                  |
| SBR3               | 24 (73%)                          | 19 (60%)                           |                       |

<sup>a</sup>*P* (Fisher exact test) was considered significant when  $P < 0.05$ .
