# Supplementary material for: MicroRNA-125b upregulation confers aromatase inhibitor resistance and is a novel marker of poor prognosis in breast cancer
Source: PubMed Central journal article supplement (PMC4342894; doi:10.1186/s13058-015-0515-1), 2015-01-30
Supplement: 13058_2015_515_MOESM8_ESM.pdf [file 13058_2015_515_MOESM8_ESM.pdf]

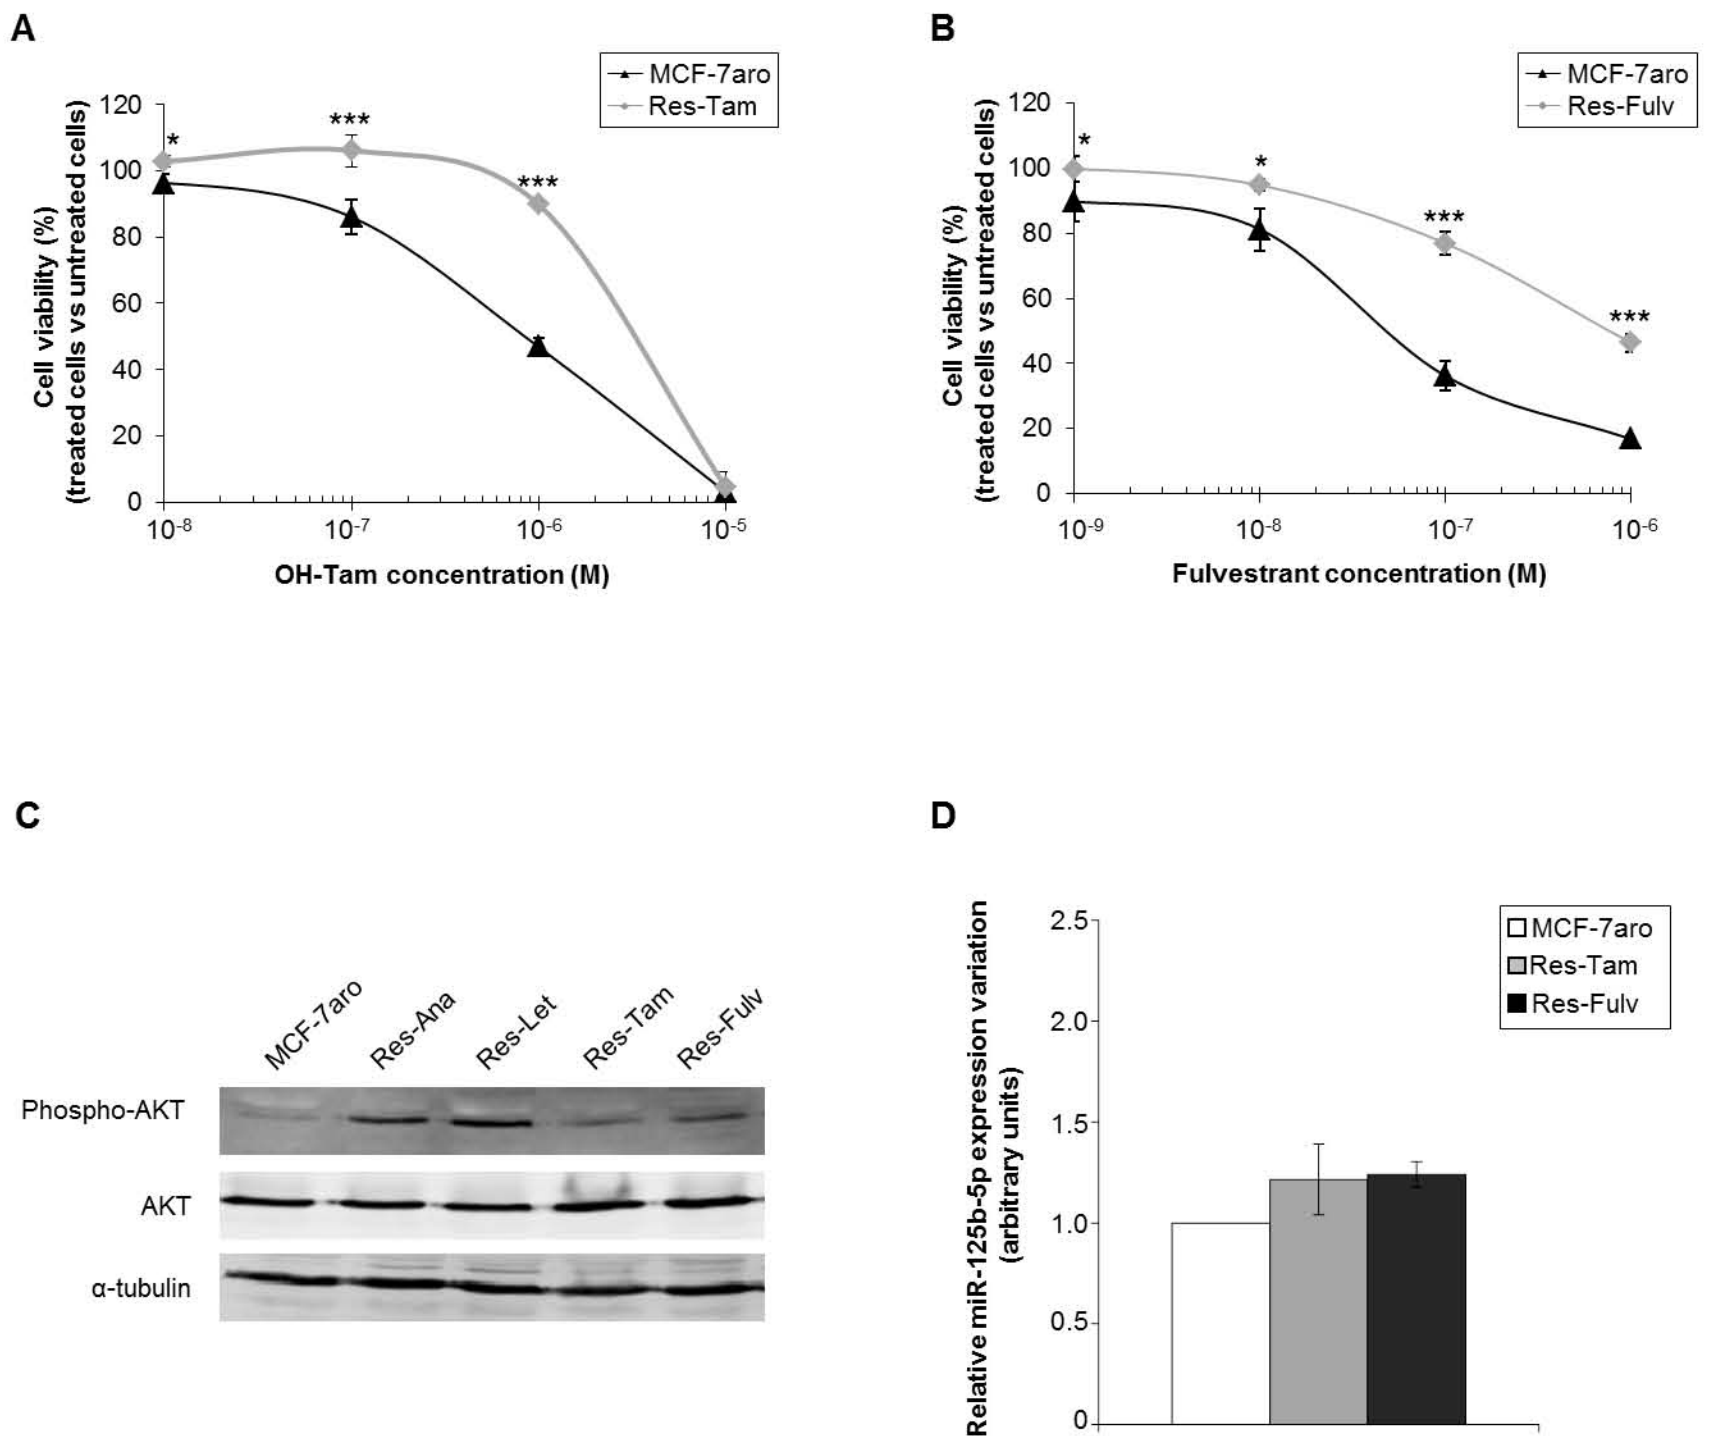

**Figure S4 miR-125b expression is not deregulated in tamoxifen or fulvestrant resistant cells that display no activation of the AKT pathway.** Pharmacological response of MCF-7aro and Res-Tam cells to OH-Tam (**A**) and of MCF-7aro and Res-Fulv cells to fulvestrant (**B**) as assessed by cytotoxicity assay (mean  $\pm$  SD from three independent experiments). \* $P < 0.05$ , and \*\*\* $P < 0.001$  versus the corresponding MCF-7aro (Student's  $t$ -test). (**C**) Western-blot analysis of the AKT status in MCF-7aro, Res-Ana, Res-Let, Res-Tam and Res-Fulv cells. Representative image from three independent experiments and cell lysates. (**D**) RTQ-PCR analysis of miR-125b-5p expression levels in Res-Tam and Res-Fulv cells versus MCF-7aro cells (mean  $\pm$  SD from at least three independent experiments).
