# Supplementary material for: MicroRNA-125b upregulation confers aromatase inhibitor resistance and is a novel marker of poor prognosis in breast cancer
Source: PubMed Central journal article supplement (PMC4342894; doi:10.1186/s13058-015-0515-1), 2015-01-30
Supplement: 13058_2015_515_MOESM9_ESM.pdf [file 13058_2015_515_MOESM9_ESM.pdf]

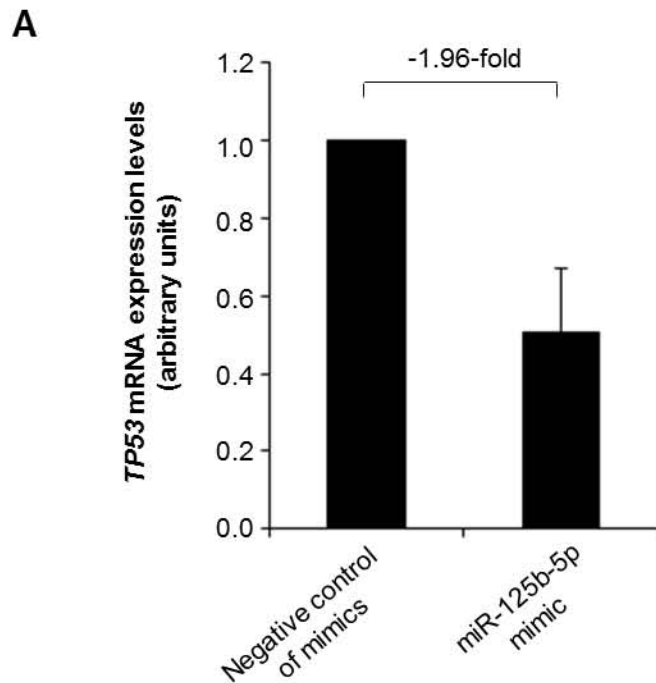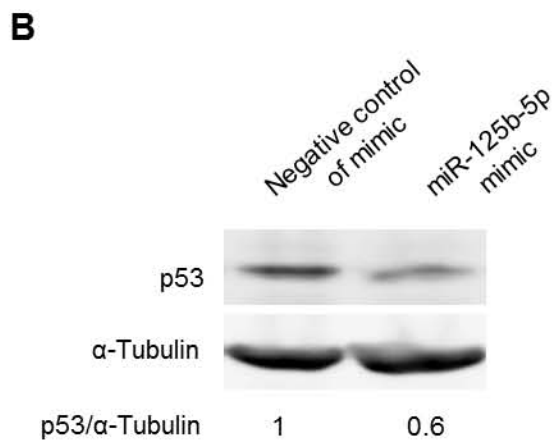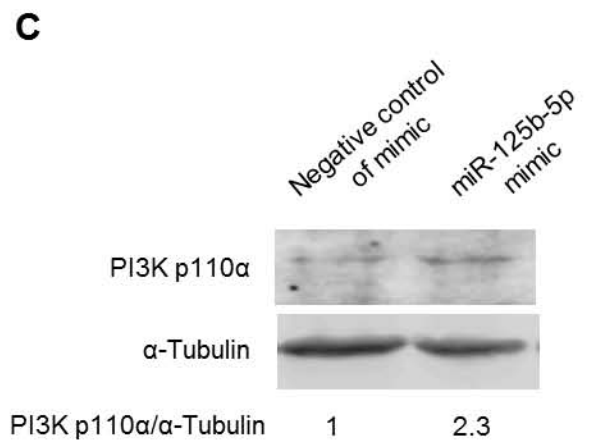

**Figure S5 p53 expression is down-regulated and PI3K p110α is up-regulated when miR-125b is over-expressed in MCF-7aro cells.** (A) RTQ-PCR validation of *TP53* deregulated expression levels in MCF-7aro cells transfected with the mimic of miR-125b-5p or the negative control (mean ± SD from two independent experiments). (B) Western-blot analysis of p53 and (C) of PI3K p110α in MCF-7aro cells transfected with the mimic of miR-125b-5p or the negative control. Representative images from two independent experiments and cell lysates. The relative expression levels of the corresponding ratio p53 / α-Tubulin or PI3K p110α / α-Tubulin were quantified and shown at the bottom of the panels.
