# Supplementary material for: MicroRNA-125b upregulation confers aromatase inhibitor resistance and is a novel marker of poor prognosis in breast cancer
Source: Springer Nature journal article supplement (doi:10.1186/s13058-015-0515-1), 2015-01-29
Supplement: MOESM7 [file 9781330]

**Table S3 Statistical comparison of the miR-125b expression levels in the HR+ breast cancer patients treated with endocrine therapy alone or combined to chemotherapy who relapsed or not at 7 years ( $n = 11$ ).**

|                               | Number of patients (%)                      |                                      | $P^a$ |
|-------------------------------|---------------------------------------------|--------------------------------------|-------|
|                               | Patients who did not relapse<br>( $n = 7$ ) | Patients who relapsed<br>( $n = 4$ ) |       |
| miR-125b-5p expression levels |                                             |                                      |       |
| Low <sup>b</sup>              | 7 (100%)                                    | 1 (25%)                              | 0.02  |
| High                          | 0 (0%)                                      | 3 (75%)                              |       |

<sup>a</sup> $P$  (Fisher exact test) was considered significant when  $P < 0.05$ .

<sup>b</sup> the median value was used to dichotomise the cohort into two groups with either low or high miR-125b-5p expression levels.
